1  
2  
3  
4  
5  
6  
7  
8  
9  
10  
11  
12  
13  
14  
15  
16  
17  
18  
19  
20  
21  
22  
23  
24  
25  
26  
27  
28  
29  
30  
31  
32  
33  
34  
35  
36  
37  
38  
39  
40

Global connectivity of the frontoparietal cognitive control network is related to depression symptoms in the general population

Douglas H. Schultz<sup>1</sup>, Takuya Ito<sup>1</sup>, Levi I. Solomyak<sup>1</sup>, Richard H. Chen<sup>1</sup>, Ravi D. Mill<sup>1</sup>, Alan Anticevic<sup>2</sup>, & Michael W. Cole<sup>1</sup>

<sup>1</sup>Center for Molecular and Behavioral Neuroscience,  
Rutgers University – Newark  
<sup>2</sup>Department of Psychiatry,  
Yale University

Corresponding author: Douglas H. Schultz  
Center for Molecular and Behavioral Neuroscience  
197 University Ave, Suite 212  
Newark, NJ 07102  
[dhs95@newark.rutgers.edu](mailto:dhs95@newark.rutgers.edu)

KEYWORDS: fMRI, depression, frontoparietal network, functional connectivity

41 **ABSTRACT**

42

43 We all vary in our mental health, even among people not meeting diagnostic  
44 criteria for mental illness. Understanding this individual variability may reveal  
45 factors driving the risk for mental illness, as well as factors driving sub-clinical  
46 problems that still adversely affect quality of life. To better understand the large-  
47 scale brain network mechanisms underlying this variability we examined the  
48 relationship between mental health symptoms and resting-state functional  
49 connectivity patterns in cognitive control systems. One such system is the  
50 frontoparietal cognitive control network (FPN). Changes in FPN connectivity may  
51 impact mental health by disrupting the ability to regulate symptoms in a goal-  
52 directed manner. Here we test the hypothesis that FPN dysconnectivity relates to  
53 mental health symptoms even among individuals who do not meet formal  
54 diagnostic criteria but may exhibit meaningful symptom variation. We found that  
55 depression symptoms severity negatively correlated with between-network global  
56 connectivity (BGC) of the FPN. This suggests that decreased connectivity  
57 between the FPN and the rest of the brain is related to increased depression  
58 symptoms in the general population. These findings complement previous clinical  
59 studies to support the hypothesis that global FPN connectivity contributes to the  
60 regulation of mental health symptoms across both health and disease.

61

62 **AUTHOR SUMMARY**

63

64 Understanding how large-scale network interactions in the brain contribute to (or  
65 serve a protective role against) mental health symptoms is an important step  
66 toward developing more effective mental health treatments. Here we test the  
67 hypothesis that cognitive control networks play an important role in mental health  
68 by being highly connected to other brain networks and able to serve as a  
69 feedback mechanism capable of regulating symptoms in a goal-directed manner.  
70 We found that the more well-connected the frontoparietal cognitive control  
71 network was to other networks in the brain the less depression symptoms were  
72 reported by participants. These results contribute to our understanding of how  
73 brain network interactions are related to mental health symptoms, even in  
74 individuals who have not been diagnosed with a disorder.

## 75 INTRODUCTION

76

77 People vary in their degree of mental health. Indeed, people who do not  
78 meet formal criteria for mental illness as defined by our current diagnostic  
79 systems (American Psychiatric Association, 2013; World Health Organization,  
80 1992) may still experience a number of symptoms associated with that disorder  
81 (World Health Organization, 2017). Here we use this natural variability to better  
82 understand neural factors potentially contributing to day-to-day experiences of  
83 poor mental health, as well as (prodromal) factors that may elevate the risk for  
84 severe mental illness. We hypothesized that the variability observed in mental  
85 health symptoms among individuals is related to the function of the frontoparietal  
86 cognitive control network (FPN), based on our previously-developed theoretical  
87 proposal that the FPN plays a domain-general protective role against mental  
88 health symptoms (Cole et al., 2014).

89 The proposed theoretical framework suggests that alterations in FPN  
90 function may play a common role in multiple mental disorders by disrupting a  
91 domain-general cognitive control feedback mechanism that can regulate  
92 symptoms when they are experienced (Cole et al., 2014). The FPN is a  
93 candidate network for this function because it is a flexible hub, meaning it has a  
94 high degree of connectivity across the brain (Cole et al., 2010; Power et al.,  
95 2011) and can rapidly modify functional connections according to current goals  
96 (Cole et al., 2013). There is strong evidence that these FPN functions are domain  
97 general (Chein and Schneider, 2005; Cole et al., 2013; Dosenbach et al., 2007),  
98 such that individual differences in the general ability to regulate cognition can  
99 influence symptoms. Finally, alterations in FPN functional connectivity (FC) have  
100 been identified in a number of mental disorders including: depression (Kaiser et  
101 al., 2015), anxiety (Sylvester et al., 2012), schizophrenia (Baker et al., 2014; Cole  
102 et al., 2011; Fornito et al., 2011; Yang et al., 2016), attention deficit hyperactivity  
103 disorder (Li et al., 2014; Park et al., 2016), and eating disorders (Boehm et al.,  
104 2014; Cowdrey et al., 2014). Consistent with most of these studies, we focus  
105 here on FC measured using functional magnetic resonance imaging (fMRI),  
106 calculated as the temporal relationship in the blood oxygenation level dependent  
107 (BOLD) signal between brain regions (Biswal et al., 1995) while participants rest  
108 in the scanner.

109 Consistent with the flexible hub framework, a number of studies using  
110 different measures have provided converging evidence that the FPN is especially  
111 well connected to the rest of the brain (Buckner et al., 2009; Cole et al., 2010).  
112 Both of these studies calculated a summary statistic reflecting the degree of  
113 connectivity across the whole brain. However, these estimates can be influenced  
114 by the relative size of different networks. For example, nodes of a larger network  
115 will have a larger overall number of strong connections than nodes of a smaller  
116 network simply because, by definition, within-network connections are stronger  
117 on average than between-network connections (Power et al., 2013; Wig et al.,  
118 2011). Therefore, we estimated how well each region of the brain was connected  
119 to the rest of the brain using between-network global connectivity (BGC) (Ito et  
120 al., 2017), a measure not influenced by network size.

121           Particularly important for our specific test of the flexible hub framework  
122 here, patients diagnosed with major depression exhibit differences in FC patterns  
123 throughout the brain, including FPN functional connections (Brakowski et al.,  
124 2017). Specifically, connectivity between regions of the FPN is decreased in  
125 depressed individuals (Alexopoulos et al., 2012), as well as in undiagnosed  
126 individuals experiencing depression symptoms (Wei et al., 2014). However, Wei  
127 and colleagues (2014) looked at FC with specific seed regions, not global  
128 connectivity, in their sample. Another study found that global brain connectivity  
129 was decreased in the medial prefrontal cortex and the dorsolateral prefrontal  
130 cortex (dlPFC) portions of the FPN in depressed patients (Murrugh et al., 2016).  
131 Decreases in within-network FPN connectivity have also been observed in a  
132 group of individuals reporting depression symptoms in the absence of a clinical  
133 diagnosis (Hwang et al., 2015). Researchers have also attempted to subdivide  
134 depression into various types based on FC patterns. Decreases in FPN  
135 connectivity were most pronounced in one particular subtype of depression  
136 associated with increased symptoms of fatigue and decreased symptoms of  
137 anxiety (Drysdale et al., 2016). These previous results are broadly consistent  
138 with our hypothesis, yet the extension of results to test whether FPN BGC is  
139 related to mental health symptoms among healthy individuals would provide  
140 important new evidence for the general nature of FPN's role in regulating mental  
141 health.

142           Consistent with our previously-developed theoretical framework (Cole et  
143 al., 2014) along with observed FPN FC alterations in patients with major  
144 depression, we hypothesized that individual differences in depression symptoms  
145 in undiagnosed individuals would be correlated with BGC in the FPN. Support for  
146 our hypothesis would provide important evidence for a potentially general role of  
147 global FPN intrinsic FC in facilitating the regulation of mental health symptoms.

## 148 **METHODS**

### 149 **Participants**

150           Data were collected at the Rutgers University Brain Imaging Center  
151 (RUBIC). The participants were recruited from the Rutgers University-Newark  
152 campus and surrounding community. All participants provided informed consent  
153 and all procedures were approved by the Rutgers University-Newark Institutional  
154 Review Board. We collected data from 106 participants. Technical error or  
155 equipment malfunction during the scanning session resulted in removing six  
156 participants from the study. Four participants were removed from the study  
157 because they did not complete the Center for Epidemiological Studies  
158 Depression Scale (CESD) during a behavior-only session separate from the MRI  
159 session. We also collected demographic information and asked participants 11  
160 questions asking what hand they used for various activities including writing,  
161 throwing, using a scissors, holding their toothbrush, striking a match, opening a  
162 box, kicking, using a knife, using a spoon, which hand was placed on top while  
163 using a broom, and which eye they used in situations where they would only  
164 being using one eye. They replied to each question by answering always right,  
165 usually right, no preference, usually left, or always left. Answers were scored in  
166

167 the following manner: always right (2), usually right (1), no preference (0), usually  
168 left (-1), always left (-2). We calculated a laterality quotient (LQ) by summing  
169 these scores and dividing by the maximum score of 22. A LQ score of -100  
170 indicates a strong left hand preference, 0 indicates no hand preference, and 100  
171 indicates a strong right hand preference.

172 Studies have proposed that the CESD can be broken down into between  
173 one and four factors (Cole et al., 2004; Herrero and Meneses, 2006). In addition  
174 to calculating the raw CESD score for each participant we also calculated three  
175 factor scores: somatic symptoms, negative affect, and anhedonia, based on a  
176 recent study (Carleton et al., 2013). Participants also completed several  
177 measures of flexible cognition during the behavior-only session. These measures  
178 included Raven's progressive matrices (Bilker et al., 2012), Cattell's culture fair  
179 test (Cattell and Horn, 1978), and Duncan's goal neglect task (Dumontheil et al.,  
180 2011). The final sample consisted of 96 participants (See Table 1).  
181

Table 1. Demographic information

| <b>N</b>                         | 96                                  |
|----------------------------------|-------------------------------------|
| <b>Age</b>                       | <i>M</i> = 22.06, <i>SD</i> = 3.84  |
| <b>Gender</b>                    |                                     |
| Male                             | 42 (43.8%)                          |
| Female                           | 54 (56.2%)                          |
| <b>Handedness (LQ)</b>           | <i>M</i> = 74.67, <i>SD</i> = 25.2  |
| <b>Education (Highest level)</b> |                                     |
| High school                      | 14 (14.6%)                          |
| Some college                     | 50 (52.1%)                          |
| Bachelor's degree                | 29 (30.2%)                          |
| Graduate degree                  | 3 (3.1%)                            |
| <b>Cognitive measures</b>        | (Percent correct)                   |
| Raven                            | <i>M</i> = 52.29, <i>SD</i> = 15.69 |
| Cattell                          | <i>M</i> = 55.20, <i>SD</i> = 12.03 |
| Duncan                           | <i>M</i> = 76.19, <i>SD</i> = 18.34 |
| <b>CESD (raw score)</b>          | <i>M</i> = 17.41, <i>SD</i> = 9.26  |

182

183

#### 184 **MRI Parameters**

185 Multiband whole-brain echo-planar imaging (EPI) acquisition was collected  
186 using a 32-channel head coil on a 3T Siemens Trio MRI scanner with the  
187 following parameters: TR = 785 ms, TE = 34.8 ms, flip angle = 55°, Bandwidth  
188 1924/Hz/Px, in-plane FoV read = 208 mm, 72 slices, 2.0 mm isotropic voxels,  
189 with a multiband acceleration factor of 8. Whole-brain high-resolution T1-  
190 weighted and T2-weighted anatomical scans with 0.8 mm isotropic voxels were  
191 also collected. Spin echo field maps were collected in both the anterior to  
192 posterior direction and the posterior to anterior direction consistent with the  
193 Human Connectome Project preprocessing pipelines (Glasser et al., 2013). The  
194 resting-state fMRI scan was 14 minutes (1070 TRs) in duration.  
195

196

## 197 **fMRI Preprocessing**

198       Functional imaging data were preprocessed using the Human  
199 Connectome Project minimal preprocessing pipeline version 3.5.0.  
200 Preprocessing consisted of anatomical restructuring and segmentation, EPI  
201 reconstruction, segmentation, and spatial normalization to a standard template,  
202 intensity normalization, and motion correction (Glasser et al., 2013). All further  
203 processing was conducted in CIFTI 64k greyordinate standard space. The data  
204 were parcellated into 360 regions described previously (Glasser et al., 2016),  
205 taking the average time series of the vertices within a parcel. At this point all  
206 subsequent data analysis was conducted in MATLAB R2014b (The Mathworks).  
207 We performed nuisance regression using 12 motion parameters, ventricle and  
208 white matter timeseries (as well as their first derivatives), and global signal. We  
209 also performed motion scrubbing (Power et al., 2012) based on framewise  
210 displacement. Framewise displacement was calculated as the amount of head  
211 movement for each frame relative to the previous in terms of Euclidean distance.  
212 We next applied a low pass temporal filter (0.3 Hz) to the framewise  
213 displacement vector in order to reduce the effect of respiration on our framewise  
214 displacement measure (Siegel et al., 2016). The framewise displacement  
215 threshold for motion scrubbing was set at 0.3 mm. Motion scrubbing consisted of  
216 removing the flagged frame from the timeseries as well as one frame prior and  
217 the two frames following. FC was estimated by calculating the Pearson  
218 correlation of the BOLD timeseries between each pair of the parcels defined by  
219 Glasser and colleagues (Glasser et al., 2016).

220

## 221 **Network Assignment and Analysis**

222       The network assignment of each of the parcels was completed on an  
223 independent dataset, the Human Connectome Project (100 unrelated) (Van  
224 Essen et al., 2013). Briefly, each parcel was assigned to a network using the  
225 Generalized Louvain method for community detection. This process was  
226 conducted using resting-state data. We identified 12 functional networks (Spronk  
227 et al., 2017) (See Figure 1). The functional network topology findings replicate  
228 the major features of several previously published network partitions (Gordon et  
229 al., 2016; Power et al., 2011; Yeo et al., 2011).

230

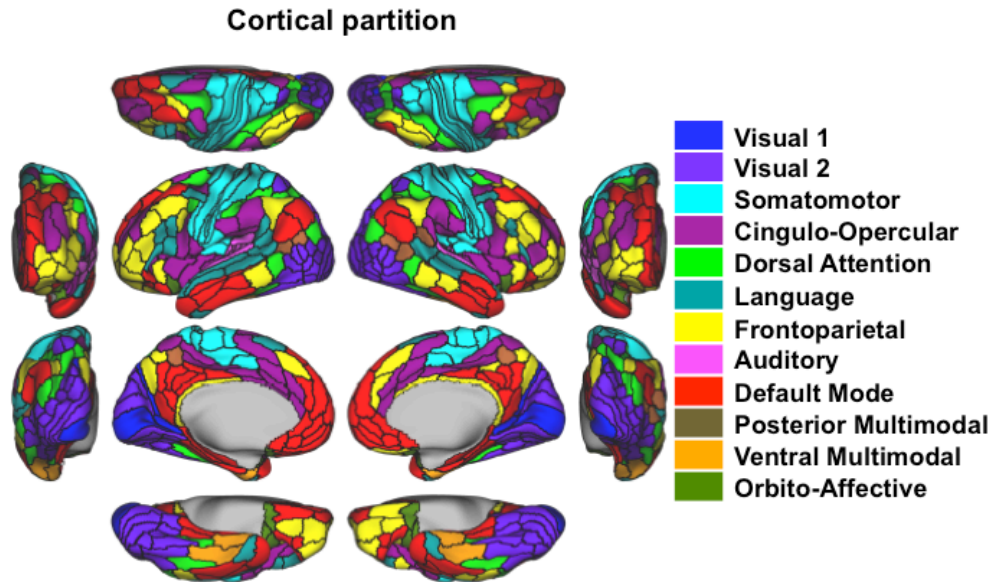

231  
232 **Figure 1 - Network assignment.** Resting-state fMRI data from an independent dataset (HCP:  
233 100 unrelated) was used to assign each parcel to a network using a community detection  
234 algorithm. This resulted in 12 total networks. Color indicates the network assignment for each  
235 parcel.

236  
237 We were interested in the relationship between the frequency at which  
238 participants experienced depression symptoms and the degree of between-  
239 network global connectivity (BGC). Specifically, we were interested in a measure  
240 that would estimate the strength of FC for each region of a network to all of the  
241 other regions in different networks. BGC was calculated for each region  
242 individually and defined as the mean FC for all out-of-network connections. Out-  
243 of-network connections were defined as all connections from a source region to  
244 target regions outside the source region's network. This process was completed  
245 for all regions until we had a BGC value for each region in the brain. Then we  
246 calculated the mean BGC value for each of the functional networks to summarize  
247 effects at the network level.

248 More formally, BGC was defined for each region as:

$$BGC_i = \frac{\sum_{j \notin C} W_{ij}}{N_{total} - N_C}$$

249 where  $BGC_i$  corresponds to the out-of-network weighted degree of region  $i$  in  
250 network  $C$ ,  $j \notin C$  corresponds to all regions not in network  $C$ ,  $W_{ij}$  corresponds to  
251 the FC estimate between regions  $i$  and  $j$ ,  $N_{total}$  corresponds to the total number  
252 of regions, and  $N_C$  corresponds to the total number of regions in network  $C$ .

253 We tested the relationship between BGC and depression symptoms in all  
254 brain networks. Due to the large number of statistical tests we report the false-  
255 discovery rate (FDR)-corrected  $p$ -values for primary analyses (Benjamini and  
256 Hochberg, 1995). Our main hypothesis was that BGC in the FPN was correlated  
257 with depression symptoms. Because this was a primary hypothesis based on our  
258 previous publication (Cole et al., 2014) we report the uncorrected  $p$ -value.



259 Follow-up and control analyses were not independent of the primary tests and  
260 are therefore not corrected.

261

## 262 RESULTS

263

### 264 Depression Symptom Scores

265 We hypothesized that the frequency of experiencing depression  
266 symptoms is related to individual differences in the between-network global  
267 connectivity of the FPN. This would be consistent with the involvement of FPN in  
268 domain-general cognitive regulation, broadly construed to include emotion (Cole  
269 et al., 2014). We used a standard measure of depression symptoms, the CESD,  
270 to measure the frequency of depression symptoms. The CESD consists of 20  
271 questions asking how frequently participants have experienced symptoms related  
272 to depression over the last seven days. CESD scores ( $M = 17.41$ ,  $SD = 9.26$ )  
273 varied from a minimum of 0 to a maximum of 43 (out of a possible 60). The  
274 characteristics of our sample were consistent with previous studies using the  
275 CESD with undiagnosed young adults (Gress-Smith et al., 2015; Van Dam and  
276 Earleywine, 2011). However, the scores were not normally distributed based on a  
277 Kolomogorov–Smirnov test ( $p < 0.023$ ). We therefore used the Box-Cox power  
278 transformation (Box and Cox, 1964), a common approach to correct for non-  
279 normality. After the transformation the data no longer deviated from a normal  
280 distribution ( $p = 0.17$ ). The transformed data were used for all subsequent  
281 analyses. CESD scores were not correlated with any of the flexible cognition  
282 measures (*smallest*  $p = 0.28$ ).

283 We also calculated CESD sub-scores for somatic, negative affect, and  
284 anhedonia factors. After Box-Cox transformation none of the factor score  
285 distributions significantly deviated from a normal distribution (*somatic*  $p = 0.4$ ,  
286 *negative affect*  $p = 0.19$ , *anhedonia*  $p = 0.056$ ). All three of the factors were  
287 significantly correlated with the overall CESD scores (*somatic*  $r = 0.77$ ,  
288 *uncorrected*  $p < 0.001$ ; *negative affect*  $r = 0.80$ , *uncorrected*  $p < 0.001$ ; *anhedonia*  
289  $r = 0.52$ , *uncorrected*  $p < 0.001$ , See Table 2). The three factors were also  
290 correlated with each other (*correlation between somatic and negative affect*  $r =$   
291  $0.55$ , *correlation between somatic and anhedonia*  $r = 0.18$ , *correlation between*  
292 *negative affect and anhedonia*  $r = 0.26$ , See Table 1). Although all of the factors  
293 were highly related to the overall CESD score, they appear to have contributed  
294 unique variance as the highest correlation between any two factors was only  
295 accounting for 30% of the variance (based on  $R^2$  values).

296

297

298

299

300

301

302

303

304

Table 2. Correlation between the CESD and CESD factors

|                 | Overall CESD | Somatic | Negative Affect | Anhedonia |
|-----------------|--------------|---------|-----------------|-----------|
| Overall CESD    | -----        | -----   | -----           | -----     |
| Somatic         | 0.77         | -----   | -----           | -----     |
| Negative Affect | 0.80         | 0.55    | -----           | -----     |
| Anhedonia       | 0.52         | 0.18    | 0.26            | -----     |

305

306

307

### **Between-Network Global Connectivity**

308

309

310

311

312

313

314

315

316

317

318

319

320

321

322

323

324

325

We calculated BGC values using resting-state fMRI data for each functionally defined cortical parcel (Figure 2). DMN regions tended to have lower BGC values, consistent with the conceptually-similar participation coefficient results reported by Power et al. (2011). In contrast, the FPN had high levels of BGC in lateral prefrontal portions of the network ( $M = 0.002$ ,  $SD = 0.02$ ) relative to the mean of regions outside of the FPN ( $M = -0.0081$ ,  $SD = 0.013$ ;  $t(95) = 5.08$ ,  $p < 0.0001$ ). However, FPN had lower BGC values in parietal ( $M = -0.0258$ ,  $SD = 0.0190$ ), inferior frontal ( $M = -0.0177$ ,  $SD = 0.0209$ ) and temporal lobe regions of the network ( $M = -0.0420$ ,  $SD = 0.0221$ ) relative to the mean of regions outside of the FPN (*largest*  $p < 0.0001$ ). Sensory networks exhibited two patterns. The visual network had some of the lowest BGC values in the brain with the primary visual cortex region showing the least BGC in the network ( $M = -0.0742$ ,  $SD = 0.0348$ ). In contrast, the auditory network ( $M = 0.0212$ ,  $SD = 0.0171$ ) and portions of the sensorimotor network surrounding the central sulcus ( $M = 0.0117$ ,  $SD = 0.0249$ ) both showed a high degree of BGC. The sensorimotor regions closest to the central sulcus showed more moderate BGC scores ( $M = -0.0139$ ,  $SD = 0.0289$ ).

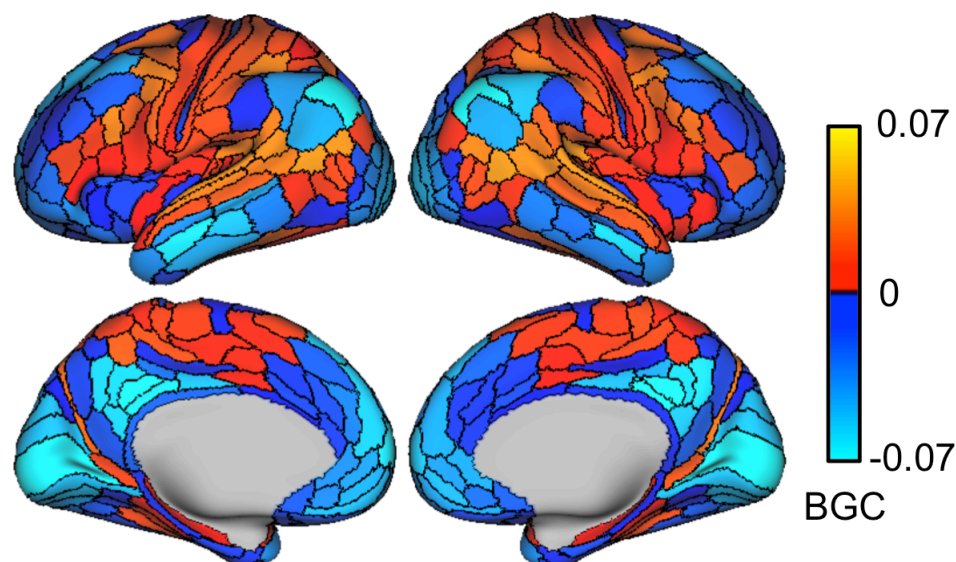

326

**Figure 2 – Between network global connectivity (BGC) across all cortical regions.** Between network global connectivity for region A is defined as the mean FC (Pearson correlation) between that region A and all other regions outside of region A's network. Warm values indicate positive values and cool values indicate negative values.

327

328

329

### **Correlation Between BGC and Depression Symptoms**

330

331

332

333

334

335

336

337

338

339

340

341

342

343

344

345

346

347

348

349

350

351

352

353

We next tested for a relationship between BGC and depression symptoms. This involved creating a mean BGC score for each functional network and testing for correlation between those values and the depression symptom measure (See Table 3). Consistent with our a priori hypothesis, we found that FPN BGC was significantly correlated with depression symptoms ( $r = -0.247$ ,  $p = 0.015$ ) (Figure 3A). Unexpectedly, we found that DMN and language network BGC showed a similar magnitude effect (DMN  $r = -0.241$ , *uncorrected*  $p = 0.018$ ; language  $r = -0.268$ , *uncorrected*  $p = 0.008$ ) (Figure 3B & 3C). These findings suggest that greater FC between the FPN and the rest of the brain (outside of the FPN) is related to less frequent depression symptoms. Less depression symptoms are also related to greater BGC in the DMN and language networks. We report an uncorrected p-value for the test of our a priori hypothesis that FPN BGC would be related to depression symptoms. We also examined the relationship between depression symptoms and BGC in the other 11 brain networks. These p-values do not survive FDR correction for multiple comparisons, but because the magnitude of the effect observed in the DMN and language network was similar to that in the FPN we continue to report subsequent uncorrected statistics for these networks.

To address whether these findings were specific to this particular network partition we conducted a similar analysis using a different network partition scheme (Ito et al., 2017). This network partition includes a FPN and DMN, but lacks a network analogous to the language network. Using this network partition we found a similar negative correlation between BGC and depression symptoms in the FPN ( $r = -0.262$ ,  $p = 0.009$ , *FDR adjusted for multiple comparisons*  $p =$

354 0.044) and DMN ( $r = -0.250$ ,  $p = 0.014$ , *FDR adjusted*  $p = 0.049$ ). The results for  
355 the FPN and DMN both survive correction for multiple comparisons with this  
356 network partition.

357  
358

Table 3. Correlation between BGC and CESD scores

| Network               | Pearson's r   | uncorrected p-value |
|-----------------------|---------------|---------------------|
| Visual 1              | 0.015         | 0.884               |
| Visual 2              | 0.020         | 0.850               |
| Somatomotor           | -0.177        | 0.085               |
| Cingulo-Opercular     | -0.143        | 0.164               |
| Language              | -0.268        | 0.008               |
| Default Mode          | -0.241        | 0.018               |
| <b>Frontoparietal</b> | <b>-0.247</b> | <b>0.015*</b>       |
| Auditory              | -0.099        | 0.340               |
| Post. Multimodal      | -0.110        | 0.284               |
| Dorsal Attention      | -0.113        | 0.275               |
| Ventral Multimodal    | 0.116         | 0.261               |
| Orbito-Affective      | -0.078        | 0.448               |

359  
360

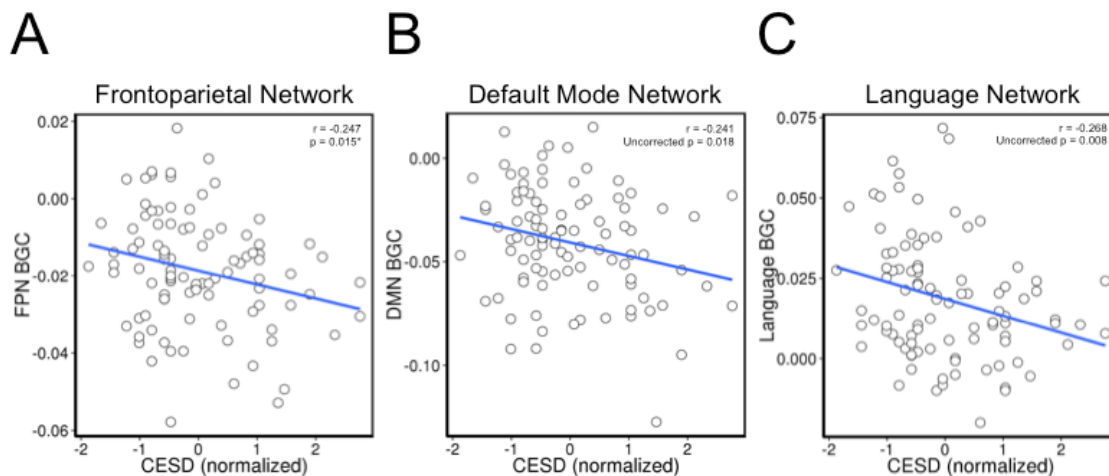

361

**Figure 3 – CESD scores and BGC in the FPN, DMN, and language networks are negatively correlated.** A) BGC in the FPN is plotted on the y-axis and CESD scores are plotted on the x-axis. B) BGC in the DMN is plotted on the y-axis and CESD scores are plotted on the x-axis. C) BGC in the language network is plotted on the y-axis and CESD scores are plotted on the x-axis.

362  
363  
364  
365  
366  
367  
368

In order to verify that these correlations were not dependent on the Box-Cox transformation we used to normalize the depression symptom data we also ran non-parametric Spearman's rank correlations, which do not require normally distributed data. The results of testing our a priori hypothesis that BGC in the FPN would be related to depression symptoms were unchanged. Specifically, the

369 BGC-depression rank correlation was consistent with significant Pearson  
370 correlations (FPN  $\rho = -0.227$ ,  $p = 0.026$ ). The Spearman rank correlations also  
371 reflected similar results to the Pearson correlation in the DMN ( $\rho = -0.220$ ,  
372 *uncorrected*  $p = 0.031$ ) and the language network ( $\rho = -0.285$ , *uncorrected*  $p =$   
373  $0.005$ ).

374 To ensure that our observed correlation between depression symptoms  
375 and BGC in the FPN was not being driven by other factors we removed the  
376 variance in the CESD scores that could be accounted for by age and gender  
377 factors with a regression model and used the residuals to rerun the correlation.  
378 We still found a significant relationship between BGC in the FPN and depression  
379 symptoms ( $r = -0.220$ ,  $p = 0.031$ ). This result suggests that the relationship  
380 between BGC in the FPN and depression scores is not being influenced by age  
381 or gender differences in our sample.

382 Next, we tested if the relationships between BGC and overall depression  
383 scores were driven by specific depression factors. We tested for correlation  
384 between the BGC values and three factors derived from the CESD questionnaire:  
385 somatic symptoms, negative affect, and anhedonia symptoms (Carleton et al.,  
386 2013). In the FPN, BGC was only significantly correlated with anhedonia  
387 symptoms ( $r = -0.253$ ,  $p = 0.013$ ). FPN BGC was not correlated with somatic  
388 symptoms ( $r = -0.149$ ,  $p = 0.149$ ) or negative affect ( $r = -0.137$ ,  $p = 0.183$ ). In the  
389 DMN, BGC was only marginally significantly correlated with somatic symptoms ( $r$   
390  $= -0.189$ , *uncorrected*  $p = 0.064$ ) and anhedonia symptoms ( $r = -0.192$ ,  
391 *uncorrected*  $p = 0.060$ ), and not significantly correlated with negative affect ( $r = -$   
392  $0.119$ , *uncorrected*  $p = 0.247$ ). In the language network, BGC was correlated with  
393 somatic symptoms ( $r = -0.257$ , *uncorrected*  $p = 0.011$ ) and negative affect ( $r = -$   
394  $0.227$ , *uncorrected*  $p = 0.026$ ), but it was not significantly correlated with  
395 anhedonia ( $r = -0.167$ , *uncorrected*  $p = 0.105$ ).

396

### 397 **Observed BGC-depression Correlations were not Dependent on** 398 **Connections Between FPN, DMN, and language network**

399 The magnitude and direction of the BGC-depression correlations were  
400 similar for the FPN, DMN, and language network. One possible explanation for  
401 these results is that the observed BGC-depression effects for these networks  
402 were driven primarily by the FC between them. We tested this possibility by  
403 recalculating BGC for each network by removing connections between the FPN,  
404 DMN, and language network from the calculation. This approach minimizes the  
405 possibility that connections between these networks drove the original  
406 correlations between depression symptoms and BGC. The magnitude and  
407 direction of the correlations between depression symptoms and BGC in the FPN  
408 ( $r = -0.226$ ,  $p = 0.027$ ), the DMN ( $r = -0.236$ , *uncorrected*  $p = 0.021$ ), and the  
409 language network ( $r = -0.201$ , *uncorrected*  $p = 0.049$ ) were similar when we  
410 excluded the connections between these networks from the BGC calculation.  
411 This suggests the original BGC-depression correlations were not dependent on  
412 connections between the FPN, DMN, and language network.

413 In order to further explore the possibility that the observed relationship  
414 between depression symptoms and BGC in the FPN might be primarily driven by

415 FPN connections to the DMN and language network we calculated the  
416 correlation between the mean FPN to DMN, and FPN to language network FC  
417 with depression symptoms. There was not a significant correlation between  
418 depression symptoms and the mean connectivity between the FPN and DMN ( $r =$   
419  $-0.016$ , *uncorrected*  $p = 0.881$ ) or the mean connectivity between the FPN and  
420 language network ( $r = -0.146$ , *uncorrected*  $p = 0.156$ ). This suggests that the  
421 relationship between FPN BGC and depression symptoms is not driven by  
422 connections to the DMN and language networks, which both showed a negative  
423 correlation between BGC and depression symptoms as well.

424

### 425 **Within-Network Connectivity does not Correlate with Depression** 426 **Symptoms**

427 We focused on between-network connectivity, yet the degree of  
428 connectivity within a functional network might also be related to depression  
429 symptoms. For example, a high degree of FC within a network may reflect more  
430 homogeneous network activity. In this case the network would be tightly coupled  
431 and all of the component regions would likely be serving a very similar function.  
432 However, a lower degree of FC within a network may reflect more heterogeneous  
433 processing. In this case the different regions of a functional network may all be  
434 involved in the same general process, but they may be contributing in different  
435 ways. These differences in within-network functionality may, in turn, relate to  
436 depression symptoms.

437 Consistent with our choice to focus primarily on between-network effects,  
438 within-network FC in the FPN was not significantly correlated with depression  
439 symptoms ( $r = 0.066$ ,  $p = 0.526$ ). Within-network FC in the DMN was also not  
440 significantly correlated with depression symptoms ( $r = 0.143$ , *uncorrected*  $p =$   
441  $0.164$ ). The language network showed a negative correlation between  
442 depression symptoms and within-network FC ( $r = -0.219$ , *uncorrected*  $p = 0.032$ ).  
443 We observed a significant difference in the DMN correlation coefficients  
444 comparing BGC ( $r = -0.241$ ) and within-network connectivity ( $r = 0.143$ ) with  
445 depression symptoms ( $z = 2.66$ ,  $p = 0.008$ ). It will be important for future studies  
446 to test this effect for replication, given the non-significance of the DMN within-  
447 network FC-depression effect relative to a correlation of 0.

448

## 449 **DISCUSSION**

450 Based on convergent evidence across a variety of mental health  
451 conditions we predicted that individual differences in FPN BGC would be  
452 correlated with symptoms associated with depression (Cole et al., 2014). This is  
453 consistent with extensive evidence that the FPN is a domain-general cognitive  
454 control system regulating general goal pursuit processes (Cole and Schneider,  
455 2007; Duncan, 2010; Schneider, 2003), including regulation of mental illness  
456 symptoms (Cole et al., 2014). We sought to expand the general relevance of this  
457 framework by including symptoms experienced in everyday life, which express  
458 dimensionally across health and disease. This involved investigating the  
459 relationship between the mood symptoms, one of the most commonly  
460 experienced set of symptoms in the general population (Centers for Disease

461 Control and Prevention (CDC), 2010), and FPN global connectivity properties.  
462 We further ensured the broad relevance of the findings by focusing on how a  
463 general population who had not been diagnosed with a mental disorder varied in  
464 their depression symptoms and primarily experienced them in the normal (i.e.,  
465 sub-clinical) range.

466 As predicted, we found a significant relationship between how well-  
467 connected the FPN was to the rest of the brain and the frequency of depression  
468 symptoms in adults who had not been diagnosed with depression. We used BGC  
469 to estimate the degree of brain-wide connectivity for each brain region. The  
470 results suggest that individuals who report fewer depression symptoms are  
471 characterized by a FPN that is more connected to the rest of the brain. These  
472 results support our previously developed theoretical framework, suggesting  
473 natural variance in FPN global connectivity influences each individual's ability to  
474 regulate mood symptoms in everyday life. Extending this framework to test if  
475 FPN function relates to natural variation in other symptom domains will be critical  
476 as well as examining if such effects persist when an individual crosses a  
477 threshold necessary for a formal diagnosis.

478

#### 479 **Between-network global connectivity identifies how well each brain region** 480 **is connected to other brain networks**

481 We hypothesized that individuals exhibiting greater FC between the FPN  
482 and the rest of the brain would report fewer depression symptoms. We used  
483 BGC, a measure that calculates the mean FC between each brain region and all  
484 other out-of-network brain regions (Ito et al., 2017), to evaluate this hypothesis.  
485 BGC reduces the potential bias of other graph centrality measures, which can be  
486 inflated in regions assigned to large networks (Power et al., 2013). Previous  
487 methods using global brain connectivity and degree, which both include within  
488 network connections, result in DMN regions showing high connectivity with the  
489 rest of the brain (Buckner et al., 2009; Cole et al., 2010; Liang et al., 2013).  
490 However, we found that BGC was relatively low in the DMN. This is consistent  
491 with DMN results from studies using participation coefficient (the proportion of  
492 between-network vs. within-network connectivity) (Power et al., 2011, 2013).  
493 These results suggest that previous findings identifying the DMN as highly  
494 connected to the rest of the brain are largely driven by high FC within the DMN,  
495 and do not necessarily reflect greater connectivity between the DMN and nodes  
496 in other functional networks.

497 The results we observed with BGC were similar to previous attempts to  
498 identify hubs and the most well connected regions in the brain. BGC was high in  
499 the lateral prefrontal cortex, the motor and tactile cortex, the auditory cortex, and  
500 higher order visual regions. Lateral prefrontal regions and higher order visual  
501 areas show a greater degree of FC (Buckner et al., 2009) and a higher global  
502 brain connectivity (Cole et al., 2010). Higher global brain connectivity has also  
503 been reported in the lateral prefrontal cortex, higher order visual regions, auditory  
504 cortex, and somatosensory cortex (Liang et al., 2013). We observed that BGC  
505 was consistent with previous attempts to classify the degree of connectivity in  
506 many brain regions.

507           There were some discrepancies between previous methods and BGC. We  
508 found that BGC was quite low in lower visual regions in contrast to higher  
509 connectivity estimates calculated by others (Cole et al., 2010; Liang et al., 2013).  
510 The differences observed between BGC and other measures of connectivity  
511 strength may be driven by BGC not considering the relatively strong local  
512 connections within the visual network. In fact, primary and secondary visual  
513 cortex show high local connectivity relative to distant connectivity strength  
514 (Sepulcre et al., 2010). It will be important for future studies to identify whether  
515 differences observed in primary sensory cortices are driven by an imbalance  
516 between within and between-network connectivity.

517

### 518 **BGC in the FPN is negatively correlated with depression symptoms**

519           We found that BGC in the FPN showed a significant negative correlation  
520 with depression symptoms. This suggests that individuals exhibiting greater  
521 connectivity of the FPN with the rest of the brain experience fewer symptoms of  
522 depression. The correlation between BGC in the FPN and depression symptoms  
523 supports our hypothesis that a well-connected FPN may serve a protective role  
524 against depression symptoms and possibly mental health symptoms in general  
525 (Cole et al., 2014).

526           Decreases in FPN FC have been reported in individuals diagnosed with  
527 major depression (Alexopoulos et al., 2012; Murrrough et al., 2016; Veer, 2010).  
528 Differences in FC patterns can also be used to divide depression into distinct  
529 subtypes (Drysdale et al., 2016). We build on these findings by observing similar  
530 results in a variable sample of undiagnosed individuals that likely includes  
531 primarily mentally healthy, but also some mentally unhealthy, participants.  
532 Another study examining FC in a group of undiagnosed individuals with higher  
533 levels of depression symptoms found that connectivity between the superior  
534 parietal lobule and the dlPFC portion of the FPN was decreased (Wei et al.,  
535 2014). Undiagnosed participants experiencing more depression symptoms have  
536 also been reported to have reduced FC between dlPFC and the supramarginal  
537 gyrus, insula, operculum, precuneus and parahippocampal gyrus (Hwang et al.,  
538 2015). Our findings suggest that greater global connectivity of the FPN is related  
539 to reduced depression symptoms. Our data regarding global connectivity  
540 differences is consistent with a recent study that found reduced global brain  
541 connectivity in the lateral PFC in depression patients (Abdallah et al., 2016).

542           Unexpectedly, we also found a negative correlation between BGC in the  
543 DMN and depression symptoms. This result did not survive multiple comparison  
544 correction, but because it was of a similar magnitude as our predicted  
545 relationship in the FPN we have explored it. It is important to note that the results  
546 in the DMN should be interpreted with caution and future studies should attempt  
547 to replicate these results. DMN activity has been linked to rumination symptoms  
548 in depression (Hamilton et al., 2011). This finding may reflect an inability for  
549 individuals experiencing more depression symptoms to disengage the DMN in  
550 situations when attentional or cognitive resources need to be allocated (Sheline  
551 et al., 2009). Depression patients also exhibit decreased FC between the DMN  
552 and executive networks (Abbott et al., 2013; Manoliu et al., 2014). These findings



553 provide further support for the interpretation that depressed individuals may have  
554 a difficult time disengaging the DMN because the connections from cognitive  
555 control networks to the DMN are decreased.

556 A number of studies have suggested that FC within portions of the DMN is  
557 increased in depression patients (Greicius et al., 2007; Li et al., 2013). Although  
558 we did not find a significant correlation between within-network FC in the DMN  
559 and depression symptoms, we did see a trend toward a positive correlation. Our  
560 lack of a correlation between within-network FC in the DMN and depression  
561 symptoms could be due to methodological differences in using a population of  
562 individuals who have not been diagnosed with a disorder versus comparing a  
563 control group to a group diagnosed with depression. Additionally, we considered  
564 the entire DMN rather than using a seed correlation approach. It will be important  
565 for future studies to investigate the relationship between within-DMN FC and  
566 depression symptoms, verifying this effect in a larger sample and tying it to  
567 specific neural mechanisms and specific depression symptoms.

568 We also found a negative correlation between BGC in the language  
569 network and depression symptoms. Similar to the DMN, this result did not survive  
570 multiple comparison correction, but because the magnitude of the effect was  
571 similar to that of our predicted relationship between BGC in the FPN and  
572 depression symptoms we have explored it. Because we did not have an a priori  
573 prediction about this network and the result did not survive multiple comparison  
574 correction, the interpretation of this result should be tempered. Decreases in FC  
575 in the language network have been reported in depression patients (Buchanan et  
576 al., 2014) and language performance deficits have also been reported in  
577 depression patients (Baune et al., 2010). The current results might be consistent  
578 with these observed deficits in language in depressed individuals. However,  
579 future studies should attempt to replicate these results in an independent large  
580 sample.

581

## 582 **Conclusion**

583 The current study sought to test our previously-developed framework that  
584 suggests the FPN (along with other cognitive control networks) acts as a  
585 protective factor against mental disease via its widespread FC with other  
586 networks (Cole et al., 2014). We identified a negative correlation between  
587 depression symptoms and a measure of between-network, global FC in the FPN  
588 in a sample of individuals from the general population who had not been  
589 diagnosed with depression. These results suggest the human brain's global  
590 network architecture is critical for maintaining mental health even in undiagnosed  
591 individuals, supporting the possibility that FPN maintains a goal-directed  
592 feedback loop to regulate symptoms as they arise. It will be important for future  
593 research to characterize the exact mechanisms by which FPN influences  
594 symptoms, and to assess the possibility of enhancing FPN FC in the interest of  
595 reducing symptoms and potentially preventing the onset of mental illness.

596

597

598

599 **Acknowledgements**

600           This work was supported by the National Institute of Health (MH096801,  
601 MH109520, and AG055556). The content is solely the responsibility of the  
602 authors and does not necessarily represent the official views of any of the  
603 funding agencies.

604 **References**

605

606 Abbott, C.C., Lemke, N.T., Gopal, S., Thoma, R.J., Bustillo, J., Calhoun, V.D.,  
607 Turner, J.A., 2013. Electroconvulsive Therapy Response in Major  
608 Depressive Disorder: A Pilot Functional Network Connectivity Resting  
609 State fMRI Investigation. *Front. Psychiatry* 4.  
610 <https://doi.org/10.3389/fpsyt.2013.00010>

611 Abdallah, C.G., Averill, L.A., Collins, K.A., Geha, P., Schwartz, J., Averill, C.,  
612 DeWilde, K.E., Wong, E., Anticevic, A., Tang, C.Y., others, 2016.  
613 Ketamine treatment and global brain connectivity in major depression.  
614 *Neuropsychopharmacology*.

615 Alexopoulos, G.S., Hoptman, M.J., Kanellopoulos, D., Murphy, C.F., Lim, K.O.,  
616 Gunning, F.M., 2012. Functional connectivity in the cognitive control  
617 network and the default mode network in late-life depression. *J. Affect.*  
618 *Disord.* 139, 56–65. <https://doi.org/10.1016/j.jad.2011.12.002>

619 American Psychiatric Association, 2013. Diagnostic and statistical manual of  
620 mental disorders, 5th ed. American Psychiatric Publishing, Arlington, VA.

621 Baker, J.T., Holmes, A.J., Masters, G.A., Yeo, B.T.T., Krienen, F., Buckner, R.L.,  
622 Öngür, D., 2014. Disruption of Cortical Association Networks in  
623 Schizophrenia and Psychotic Bipolar Disorder. *JAMA Psychiatry* 71, 109.  
624 <https://doi.org/10.1001/jamapsychiatry.2013.3469>

625 Baune, B.T., Miller, R., McAfoose, J., Johnson, M., Quirk, F., Mitchell, D., 2010.  
626 The role of cognitive impairment in general functioning in major  
627 depression. *Psychiatry Res.* 176, 183–189.  
628 <https://doi.org/10.1016/j.psychres.2008.12.001>

629 Benjamini, Y., Hochberg, Y., 1995. Controlling the false discovery rate: a  
630 practical and powerful approach to multiple testing. *J R Stat Soc Ser. B*  
631 *Stat Methodol* 289–300.

632 Bilker, W.B., Hansen, J.A., Brensinger, C.M., Richard, J., Gur, R.E., Gur, R.C.,  
633 2012. Development of abbreviated nine-item forms of the Raven's  
634 Standard Progressive Matrices Test. *Assessment* 354–369.

635 Biswal, B., Zerrin Yetkin, F., Haughton, V.M., Hyde, J.S., 1995. Functional  
636 connectivity in the motor cortex of resting human brain using echo-planar  
637 mri. *Magn. Reson. Med.* 34, 537–541.

638 Boehm, I., Geisler, D., King, J.A., Ritschel, F., Seidel, M., Deza Araujo, Y.,  
639 Petermann, J., Lohmeier, H., Weiss, J., Walter, M., Roessner, V., Ehrlich,  
640 S., 2014. Increased resting state functional connectivity in the fronto-  
641 parietal and default mode network in anorexia nervosa. *Front. Behav.*  
642 *Neurosci.* 8. <https://doi.org/10.3389/fnbeh.2014.00346>

643 Box, G.E., Cox, D.R., 1964. An analysis of transformations. *J. R. Stat. Soc. Ser.*  
644 *B Methodol.* 211–252.

645 Brakowski, J., Spinelli, S., Dorig, N., Bosch, O.G., Manoliu, A., Holtforth, M.G.,  
646 Seifritz, E., 2017. Resting state brain network function in major depression  
647 - Depression symptomatology, antidepressant treatment effects, future  
648 research. *J. Psychiatr. Res.* 92, 147–159.  
649 <https://doi.org/10.1016/j.jpsychires.2017.04.007>

- 650 Buchanan, A., Wang, X., Gollan, J.K., 2014. Resting-state functional connectivity  
651 in women with Major Depressive Disorder. *J. Psychiatr. Res.* 59, 38–44.  
652 <https://doi.org/10.1016/j.jpsychires.2014.09.002>
- 653 Buckner, R.L., Sepulcre, J., Talukdar, T., Krienen, F.M., Liu, H., Hedden, T.,  
654 Andrews-Hanna, J.R., Sperling, R.A., Johnson, K.A., 2009. Cortical Hubs  
655 Revealed by Intrinsic Functional Connectivity: Mapping, Assessment of  
656 Stability, and Relation to Alzheimer’s Disease. *J. Neurosci.* 29, 1860–  
657 1873. <https://doi.org/10.1523/JNEUROSCI.5062-08.2009>
- 658 Carleton, R.N., Thibodeau, M.A., Teale, M.J.N., Welch, P.G., Abrams, M.P.,  
659 Robinson, T., Asmundson, G.J.G., 2013. The Center for Epidemiologic  
660 Studies Depression Scale: A Review with a Theoretical and Empirical  
661 Examination of Item Content and Factor Structure. *PLoS ONE* 8, e58067.  
662 <https://doi.org/10.1371/journal.pone.0058067>
- 663 Cattell, R.B., Horn, J.L., 1978. A check on the theory of fluid and crystallized  
664 intelligence with description of new subtest designs. *J. Educ. Meas.* 15,  
665 139–164.
- 666 Centers for Disease Control and Prevention (CDC), 2010. Current depression  
667 among adults---United States, 2006 and 2008. *MMWR Morb. Mortal.*  
668 *Wkly. Rep.* 59, 1229–1235.
- 669 Chein, J.M., Schneider, W., 2005. Neuroimaging studies of practice-related  
670 change: fMRI and meta-analytic evidence of a domain-general control  
671 network for learning. *Cogn. Brain Res.* 25, 607–623.  
672 <https://doi.org/10.1016/j.cogbrainres.2005.08.013>
- 673 Cole, J.C., Rabin, A.S., Smith, T.L., Kaufman, A.S., 2004. Development and  
674 Validation of a Rasch-Derived CES-D Short Form. *Psychol. Assess.* 16,  
675 360–372. <https://doi.org/10.1037/1040-3590.16.4.360>
- 676 Cole, M.W., Anticevic, A., Repovs, G., Barch, D., 2011. Variable Global  
677 Dysconnectivity and Individual Differences in Schizophrenia. *Biol.*  
678 *Psychiatry* 70, 43–50. <https://doi.org/10.1016/j.biopsych.2011.02.010>
- 679 Cole, M.W., Pathak, S., Schneider, W., 2010. Identifying the brain’s most globally  
680 connected regions. *NeuroImage* 49, 3132–3148.  
681 <https://doi.org/10.1016/j.neuroimage.2009.11.001>
- 682 Cole, M.W., Repovš, G., Anticevic, A., 2014. The Frontoparietal Control System  
683 A Central Role in Mental Health. *The Neuroscientist* 20, 652–664.
- 684 Cole, M.W., Reynolds, J.R., Power, J.D., Repovs, G., Anticevic, A., Braver, T.S.,  
685 2013. Multi-task connectivity reveals flexible hubs for adaptive task  
686 control. *Nat. Neurosci.* 16, 1348–1355. <https://doi.org/10.1038/nn.3470>
- 687 Cole, M.W., Schneider, W., 2007. The cognitive control network: Integrated  
688 cortical regions with dissociable functions. *NeuroImage* 37, 343–360.  
689 <https://doi.org/10.1016/j.neuroimage.2007.03.071>
- 690 Cowdrey, F.A., Filippini, N., Park, R.J., Smith, S.M., McCabe, C., 2014.  
691 Increased resting state functional connectivity in the default mode network  
692 in recovered anorexia nervosa: Resting State Functional Connectivity in  
693 the DMN in Recovered AN. *Hum. Brain Mapp.* 35, 483–491.  
694 <https://doi.org/10.1002/hbm.22202>

- 695 Dosenbach, N.U., Fair, D.A., Miezin, F.M., Cohen, A.L., Wenger, K.K.,  
696 Dosenbach, R.A., Fox, M.D., Snyder, A.Z., Vincent, J.L., Raichle, M.E.,  
697 others, 2007. Distinct brain networks for adaptive and stable task control  
698 in humans. *Proc. Natl. Acad. Sci.* 104, 11073–11078.
- 699 Drysdale, A.T., Grosenick, L., Downar, J., Dunlop, K., Mansouri, F., Meng, Y.,  
700 Fetcho, R.N., Zebley, B., Oathes, D.J., Etkin, A., Schatzberg, A.F.,  
701 Sudheimer, K., Keller, J., Mayberg, H.S., Gunning, F.M., Alexopoulos,  
702 G.S., Fox, M.D., Pascual-Leone, A., Voss, H.U., Casey, B., Dubin, M.J.,  
703 Liston, C., 2016. Resting-state connectivity biomarkers define  
704 neurophysiological subtypes of depression. *Nat. Med.* 23, 28–38.  
705 <https://doi.org/10.1038/nm.4246>
- 706 Dumontheil, I., Thompson, R., Duncan, J., 2011. Assembly and use of new task  
707 rules in fronto-parietal cortex. *J. Cogn. Neurosci.* 23, 168–182.
- 708 Duncan, J., 2010. The multiple-demand (MD) system of the primate brain: mental  
709 programs for intelligent behaviour. *Trends Cogn. Sci.* 14, 172–179.  
710 <https://doi.org/10.1016/j.tics.2010.01.004>
- 711 Fornito, A., Yoon, J., Zalesky, A., Bullmore, E.T., Carter, C.S., 2011. General and  
712 Specific Functional Connectivity Disturbances in First-Episode  
713 Schizophrenia During Cognitive Control Performance. *Biol. Psychiatry* 70,  
714 64–72. <https://doi.org/10.1016/j.biopsych.2011.02.019>
- 715 Glasser, M.F., Coalson, T.S., Robinson, E.C., Hacker, C.D., Harwell, J., Yacoub,  
716 E., Ugurbil, K., Andersson, J., Beckmann, C.F., Jenkinson, M., Smith,  
717 S.M., Van Essen, D.C., 2016. A multi-modal parcellation of human  
718 cerebral cortex. *Nature* 536, 171–178. <https://doi.org/10.1038/nature18933>
- 719 Glasser, M.F., Sotiropoulos, S.N., Wilson, J.A., Coalson, T.S., Fischl, B.,  
720 Andersson, J.L., Xu, J., Jbabdi, S., Webster, M., Polimeni, J.R., Van  
721 Essen, D.C., Jenkinson, M., 2013. The minimal preprocessing pipelines  
722 for the Human Connectome Project. *NeuroImage* 80, 105–124.  
723 <https://doi.org/10.1016/j.neuroimage.2013.04.127>
- 724 Gordon, E.M., Laumann, T.O., Adeyemo, B., Huckins, J.F., Kelley, W.M.,  
725 Petersen, S.E., 2016. Generation and Evaluation of a Cortical Area  
726 Parcellation from Resting-State Correlations. *Cereb. Cortex* 26, 288–303.  
727 <https://doi.org/10.1093/cercor/bhu239>
- 728 Greicius, M.D., Flores, B.H., Menon, V., Glover, G.H., Solvason, H.B., Kenna, H.,  
729 Reiss, A.L., Schatzberg, A.F., 2007. Resting-state functional connectivity  
730 in major depression: abnormally increased contributions from subgenual  
731 cingulate cortex and thalamus. *Biol. Psychiatry* 62, 429–437.
- 732 Gress-Smith, J.L., Roubinov, D.S., Andreotti, C., Compas, B.E., Luecken, L.J.,  
733 2015. Prevalence, Severity and Risk Factors for Depressive Symptoms  
734 and Insomnia in College Undergraduates: Depressive Symptoms and  
735 Insomnia in College. *Stress Health* 31, 63–70.  
736 <https://doi.org/10.1002/smi.2509>
- 737 Hamilton, J.P., Furman, D.J., Chang, C., Thomason, M.E., Dennis, E., Gotlib,  
738 I.H., 2011. Default-Mode and Task-Positive Network Activity in Major  
739 Depressive Disorder: Implications for Adaptive and Maladaptive

- 740 Ruminatation. *Biol. Psychiatry* 70, 327–333.  
741 <https://doi.org/10.1016/j.biopsych.2011.02.003>
- 742 Herrero, J., Meneses, J., 2006. Short Web-based versions of the perceived  
743 stress (PSS) and Center for Epidemiological Studies-Depression (CESD)  
744 Scales: a comparison to pencil and paper responses among Internet  
745 users. *Comput. Hum. Behav.* 22, 830–846.  
746 <https://doi.org/10.1016/j.chb.2004.03.007>
- 747 Hwang, J.W., Egorova, N., Yang, X.Q., Zhang, W.Y., Chen, J., Yang, X.Y., Hu,  
748 L.J., Sun, S., Tu, Y., Kong, J., 2015. Subthreshold depression is  
749 associated with impaired resting-state functional connectivity of the  
750 cognitive control network. *Transl. Psychiatry* 5, e683.  
751 <https://doi.org/10.1038/tp.2015.174>
- 752 Ito, T., Kulkarni, K.R., Schultz, D.H., Mill, R.D., Chen, R.H., Solomyak, L.I., Cole,  
753 M.W., 2017. Cognitive task information is transferred between brain  
754 regions via resting-state network topology. *Nat. Commun.* 8.  
755 <https://doi.org/10.1038/s41467-017-01000-w>
- 756 Kaiser, R.H., Andrews-Hanna, J.R., Wager, T.D., Pizzagalli, D.A., 2015. Large-  
757 Scale Network Dysfunction in Major Depressive Disorder: A Meta-analysis  
758 of Resting-State Functional Connectivity. *JAMA Psychiatry* 72, 603.  
759 <https://doi.org/10.1001/jamapsychiatry.2015.0071>
- 760 Li, B., Liu, L., Friston, K.J., Shen, H., Wang, L., Zeng, L.-L., Hu, D., 2013. A  
761 Treatment-Resistant Default Mode Subnetwork in Major Depression. *Biol.*  
762 *Psychiatry* 74, 48–54. <https://doi.org/10.1016/j.biopsych.2012.11.007>
- 763 Li, F., He, N., Li, Y., Chen, L., Huang, X., Lui, S., Guo, L., Kemp, G.J., Gong, Q.,  
764 2014. Intrinsic brain abnormalities in attention deficit hyperactivity  
765 disorder: a resting-state functional MR imaging study. *Radiology* 272,  
766 514–523.
- 767 Liang, X., Zou, Q., He, Y., Yang, Y., 2013. Coupling of functional connectivity and  
768 regional cerebral blood flow reveals a physiological basis for network hubs  
769 of the human brain. *Proc. Natl. Acad. Sci.* 110, 1929–1934.  
770 <https://doi.org/10.1073/pnas.1214900110>
- 771 Manoliu, A., Meng, C., Brandl, F., Doll, A., Tahmasian, M., Scherr, M.,  
772 Schwerthöffer, D., Zimmer, C., Förstl, H., Bäuml, J., Riedl, V.,  
773 Wohlschläger, A.M., Sorg, C., 2014. Insular dysfunction within the  
774 salience network is associated with severity of symptoms and aberrant  
775 inter-network connectivity in major depressive disorder. *Front. Hum.*  
776 *Neurosci.* 7. <https://doi.org/10.3389/fnhum.2013.00930>
- 777 Murrough, J.W., Abdallah, C.G., Anticevic, A., Collins, K.A., Geha, P., Averill,  
778 L.A., Schwartz, J., DeWilde, K.E., Averill, C., Jia-Wei Yang, G., Wong, E.,  
779 Tang, C.Y., Krystal, J.H., Iosifescu, D.V., Charney, D.S., 2016. Reduced  
780 global functional connectivity of the medial prefrontal cortex in major  
781 depressive disorder: Global Connectivity in MDD. *Hum. Brain Mapp.* 37,  
782 3214–3223. <https://doi.org/10.1002/hbm.23235>
- 783 Park, B., Hong, J., Lee, S.-H., Park, H., 2016. Functional Connectivity of Child  
784 and Adolescent Attention Deficit Hyperactivity Disorder Patients:

- 785 Correlation with IQ. *Front. Hum. Neurosci.* 10.  
786 <https://doi.org/10.3389/fnhum.2016.00565>
- 787 Power, J.D., Barnes, K.A., Snyder, A.Z., Schlaggar, B.L., Petersen, S.E., 2012.  
788 Spurious but systematic correlations in functional connectivity MRI  
789 networks arise from subject motion. *NeuroImage* 59, 2142–2154.  
790 <https://doi.org/10.1016/j.neuroimage.2011.10.018>
- 791 Power, J.D., Cohen, A.L., Nelson, S.M., Wig, G.S., Barnes, K.A., Church, J.A.,  
792 Vogel, A.C., Laumann, T.O., Miezin, F.M., Schlaggar, B.L., Petersen, S.E.,  
793 2011. Functional Network Organization of the Human Brain. *Neuron* 72,  
794 665–678. <https://doi.org/10.1016/j.neuron.2011.09.006>
- 795 Power, J.D., Schlaggar, B.L., Lessov-Schlaggar, C.N., Petersen, S.E., 2013.  
796 Evidence for Hubs in Human Functional Brain Networks. *Neuron* 79, 798–  
797 813. <https://doi.org/10.1016/j.neuron.2013.07.035>
- 798 Schneider, W., 2003. Controlled & automatic processing: behavior, theory, and  
799 biological mechanisms. *Cogn. Sci.* 27, 525–559.  
800 [https://doi.org/10.1016/S0364-0213\(03\)00011-9](https://doi.org/10.1016/S0364-0213(03)00011-9)
- 801 Sepulcre, J., Liu, H., Talukdar, T., Martincorena, I., Yeo, B.T.T., Buckner, R.L.,  
802 2010. The Organization of Local and Distant Functional Connectivity in the  
803 Human Brain. *PLoS Comput. Biol.* 6, e1000808.  
804 <https://doi.org/10.1371/journal.pcbi.1000808>
- 805 Sheline, Y.I., Barch, D.M., Price, J.L., Rundle, M.M., Vaishnavi, S.N., Snyder,  
806 A.Z., Mintun, M.A., Wang, S., Coalson, R.S., Raichle, M.E., 2009. The  
807 default mode network and self-referential processes in depression. *Proc.*  
808 *Natl. Acad. Sci.* 106, 1942–1947.
- 809 Siegel, J.S., Mitra, A., Laumann, T.O., Seitzman, B.A., Raichle, M., Corbetta, M.,  
810 Snyder, A.Z., 2016. Data Quality Influences Observed Links Between  
811 Functional Connectivity and Behavior. *Cereb. Cortex.*  
812 <https://doi.org/10.1093/cercor/bhw253>
- 813 Spronk, M., Ji, J.L., Kulkarni, K., Repovs, G., Anticevic, A., Cole, M.W., 2017.  
814 Mapping the human brain's cortical-subcortical functional network  
815 organization. *bioRxiv* 206292.
- 816 Sylvester, C.M., Corbetta, M., Raichle, M.E., Rodebaugh, T.L., Schlaggar, B.L.,  
817 Sheline, Y.I., Zorumski, C.F., Lenze, E.J., 2012. Functional network  
818 dysfunction in anxiety and anxiety disorders. *Trends Neurosci.* 35, 527–  
819 535. <https://doi.org/10.1016/j.tins.2012.04.012>
- 820 Van Dam, N.T., Earleywine, M., 2011. Validation of the Center for Epidemiologic  
821 Studies Depression Scale—Revised (CESD-R): Pragmatic depression  
822 assessment in the general population. *Psychiatry Res.* 186, 128–132.  
823 <https://doi.org/10.1016/j.psychres.2010.08.018>
- 824 Van Essen, D.C., Smith, S.M., Barch, D.M., Behrens, T.E.J., Yacoub, E., Ugurbil,  
825 K., 2013. The WU-Minn Human Connectome Project: An overview.  
826 *NeuroImage* 80, 62–79. <https://doi.org/10.1016/j.neuroimage.2013.05.041>
- 827 Veer, I.M., 2010. Whole brain resting-state analysis reveals decreased functional  
828 connectivity in major depression. *Front. Syst. Neurosci.* 4.  
829 <https://doi.org/10.3389/fnsys.2010.00041>

- 830 Wei, X., Shen, H., Ren, J., Li, X., Xu, X., Yang, R., Lai, L., Chen, L., Hu, J., Liu,  
831 W., Jiang, X., 2014. Altered Resting-State Connectivity in College  
832 Students with Nonclinical Depressive Symptoms. PLoS ONE 9, e114603.  
833 <https://doi.org/10.1371/journal.pone.0114603>
- 834 Wig, G.S., Schlaggar, B.L., Petersen, S.E., 2011. Concepts and principles in the  
835 analysis of brain networks: Brain networks. *Ann. N. Y. Acad. Sci.* 1224,  
836 126–146. <https://doi.org/10.1111/j.1749-6632.2010.05947.x>
- 837 World Health Organization, 2017. Depression and other common mental  
838 disorders: Global health estimates. World Health Organization, Geneva.
- 839 World Health Organization, 1992. The ICD-10 classifications of mental and  
840 behavioural disorder: Clinical descriptions and diagnostic guidelines.  
841 World Health Organization, Geneva.
- 842 Yang, G.J., Murray, J.D., Wang, X.-J., Glahn, D.C., Pearlson, G.D., Repovs, G.,  
843 Krystal, J.H., Anticevic, A., 2016. Functional hierarchy underlies  
844 preferential connectivity disturbances in schizophrenia. *Proc. Natl. Acad.*  
845 *Sci.* 113, E219–E228. <https://doi.org/10.1073/pnas.1508436113>
- 846 Yeo, B.T.T., Krienen, F.M., Sepulcre, J., Sabuncu, M.R., Lashkari, D.,  
847 Hollinshead, M., Roffman, J.L., Smoller, J.W., Zollei, L., Polimeni, J.R.,  
848 Fischl, B., Liu, H., Buckner, R.L., 2011. The organization of the human  
849 cerebral cortex estimated by intrinsic functional connectivity. *J.*  
850 *Neurophysiol.* 106, 1125–1165. <https://doi.org/10.1152/jn.00338.2011>  
851
